# Supplementary material for: Elevated circulating LncRNA NORAD fosters endothelial cell growth and averts ferroptosis by modulating the miR-106a/CCND1 axis in CAD patients
Source: PubMed Central journal article supplement — Sci Rep. 2024 Oct 16;14:24223. doi: 10.1038/s41598-024-76243-x (PMC11484692; doi:10.1038/s41598-024-76243-x), 2024-10-16
Supplement: 41598_2024_76243_MOESM3_ESM.pdf [file 41598_2024_76243_MOESM3_ESM.pdf]

Supplementary Figure 1: Original gel images of Western Blots in Figure 4D

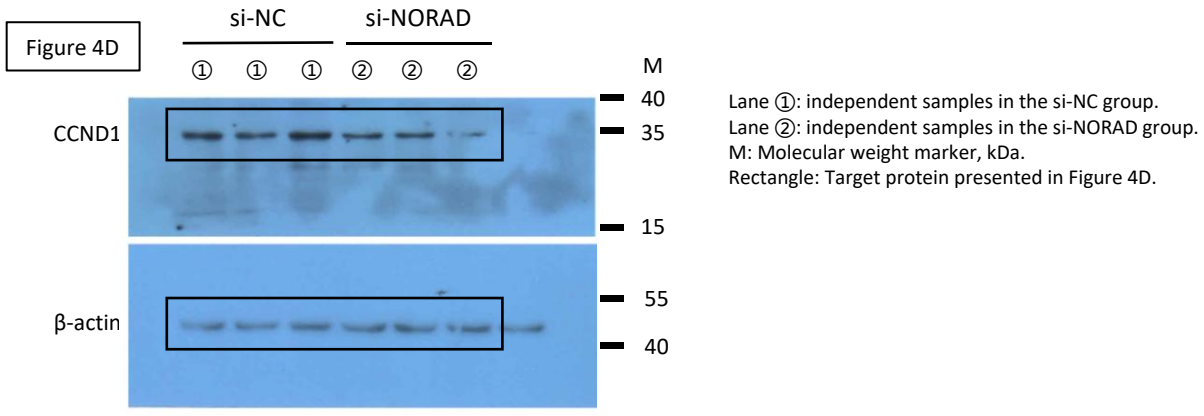

Supplementary Figure 2: Original gel images of Western Blots in Figure 6C

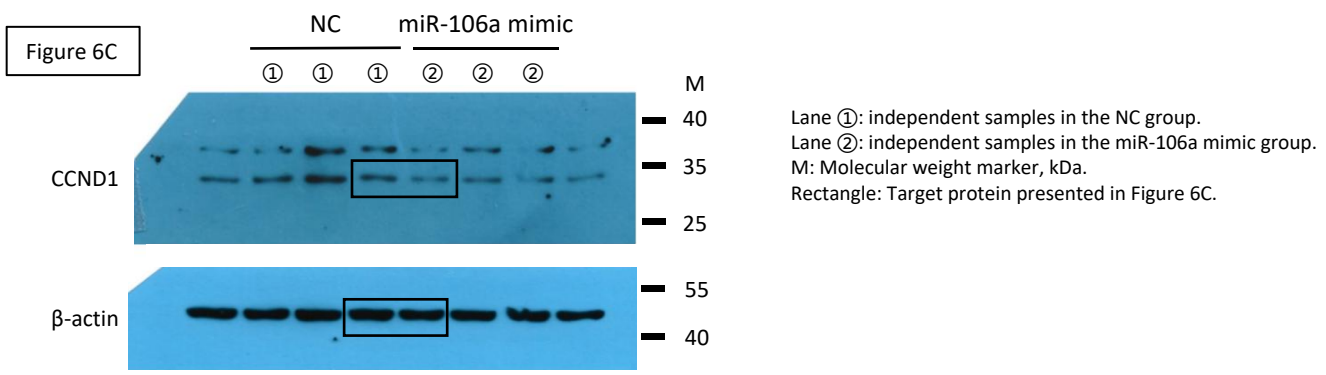

Supplementary Figure 3: Original gel images of Western Blots in Figure 7B

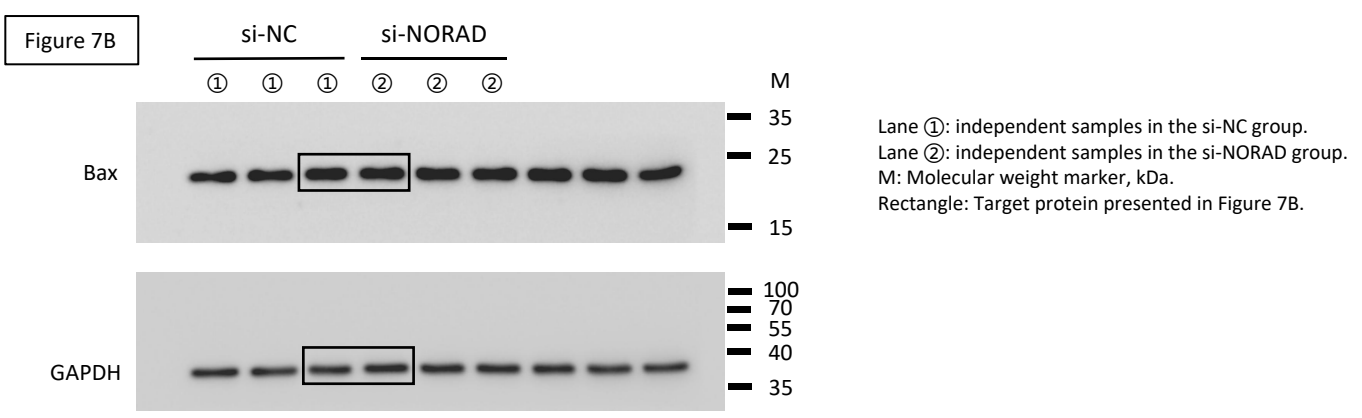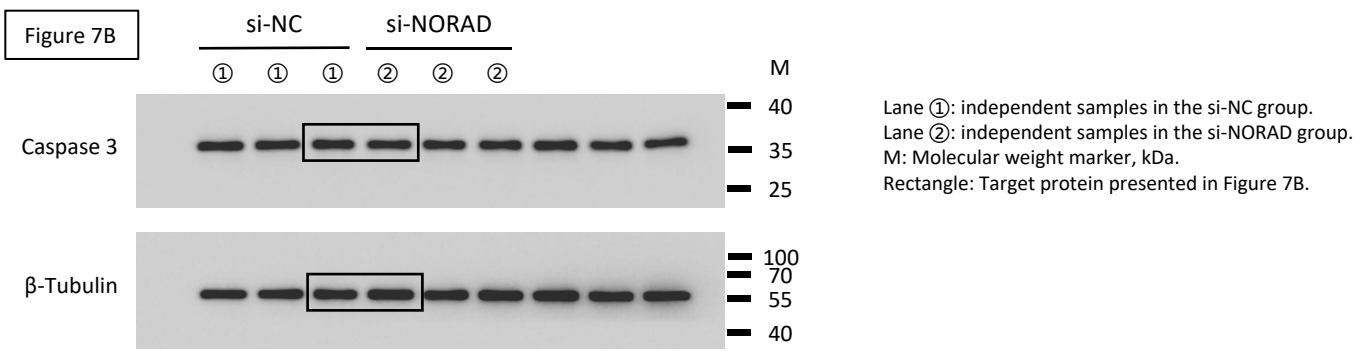

Supplementary Figure 4: Original gel images of Western Blots in Figure 7D

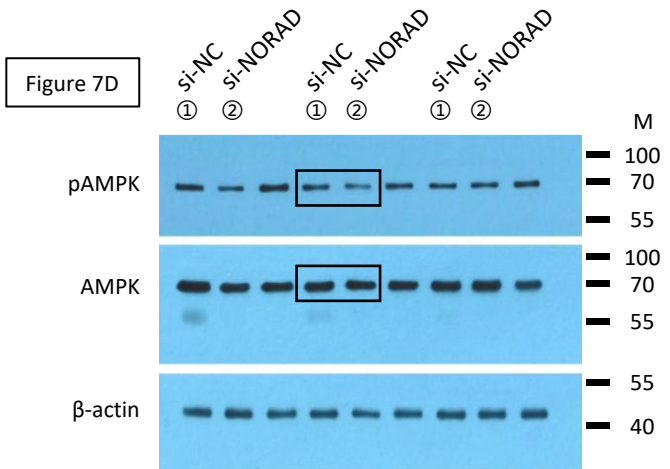

Lane ①: independent samples in the si-NC group.  
 Lane ②: independent samples in the si-NORAD group.  
 M: Molecular weight marker, kDa.  
 Rectangle: Target protein presented in Figure 7D.

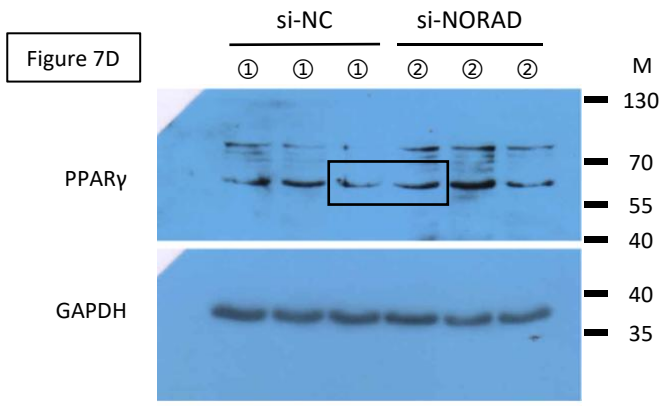

Lane ①: independent samples in the si-NC group.  
 Lane ②: independent samples in the si-NORAD group.  
 M: Molecular weight marker, kDa.  
 Rectangle: Target protein presented in Figure 7D.

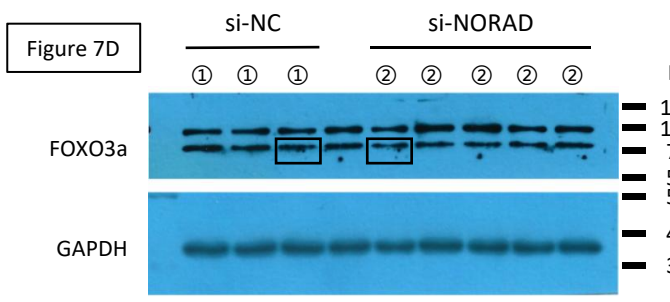

Lane ①: independent samples in the si-NC group.  
 Lane ②: independent samples in the si-NORAD group.  
 M: Molecular weight marker, kDa.  
 Rectangle: Target protein presented in Figure 7D.

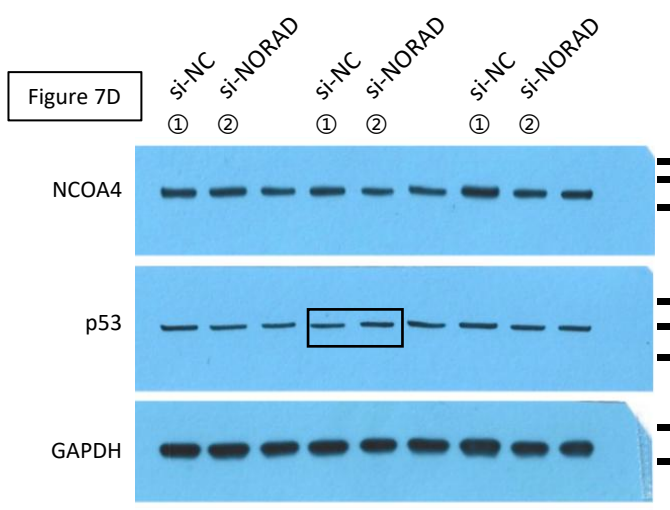

Lane ①: independent samples in the si-NC group.  
 Lane ②: independent samples in the si-NORAD group.  
 M: Molecular weight marker, kDa.  
 Rectangle: Target protein presented in Figure 7D.

Supplementary Figure 4: Original gel images of Western Blots in Figure 9E

Figure 9E

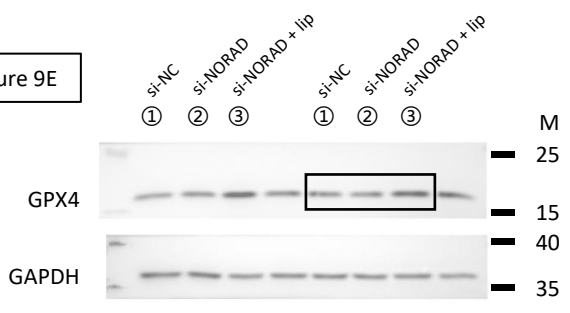

Lane ①: independent samples in the si-NC group.  
 Lane ②: independent samples in the si-NORAD group.  
 Lane ③: independent samples in the si-NORAD + lip group.  
 M: Molecular weight marker, kDa.  
 Rectangle: Target protein presented in Figure 9E.  
 Abbreviation: lip, liproxstatis.

Figure 9E

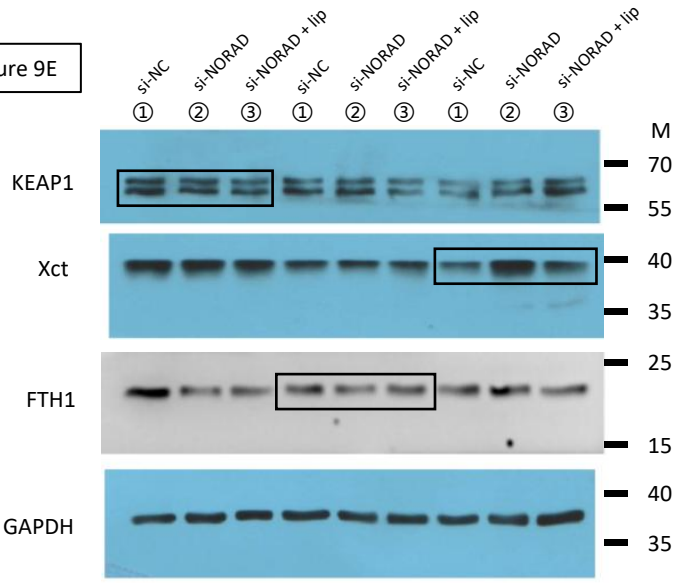

Lane ①: independent samples in the si-NC group.  
 Lane ②: independent samples in the si-NORAD group.  
 Lane ③: independent samples in the si-NORAD + lip group.  
 M: Molecular weight marker, kDa.  
 Rectangle: Target protein presented in Figure 9E.  
 Abbreviation: lip, liproxstatis.

Used Western Blot stripping buffer  
 GAPDH first, then Xct

Figure 9E

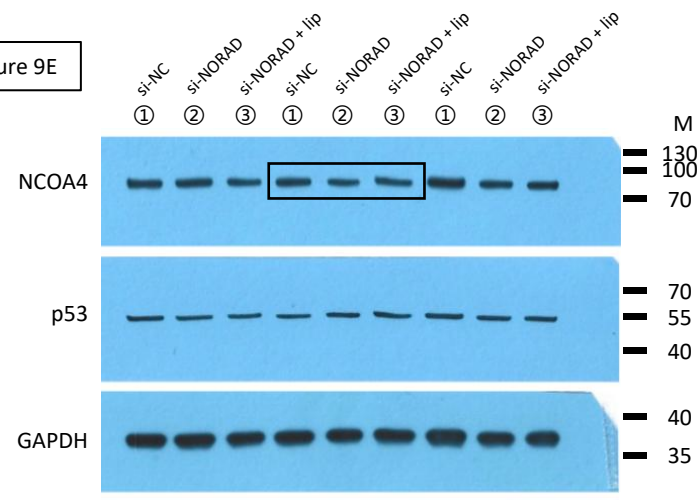

Lane ①: independent samples in the si-NC group.  
 Lane ②: independent samples in the si-NORAD group.  
 Lane ③: independent samples in the si-NORAD + lip group.  
 M: Molecular weight marker, kDa.  
 Rectangle: Target protein presented in Figure 9E.  
 Abbreviation: lip, liproxstatis.

Figure 9E

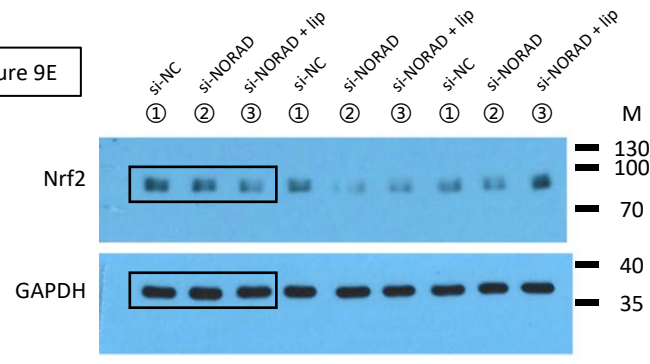

Lane ①: independent samples in the si-NC group.  
 Lane ②: independent samples in the si-NORAD group.  
 Lane ③: independent samples in the si-NORAD + lip group.  
 M: Molecular weight marker, kDa.  
 Rectangle: Target protein presented in Figure 9E.  
 Abbreviation: lip, liproxstatis.
